# Supplementary material
Source: PubMed Central journal article supplement (PMC2626160)
Supplement: NIHMS86428-supplement-1_si_001.pdf [file NIHMS86428-supplement-1_si_001.pdf]

**Supporting Information for**  
**“Quantitative Analysis of DNA Interstrand Cross-links and**  
**Monoadducts Formed in Human Cells Induced by Psoralens**  
**and UVA Irradiation” by**

Congfang Lai et al.

*(Anal. Chem., 2008)*

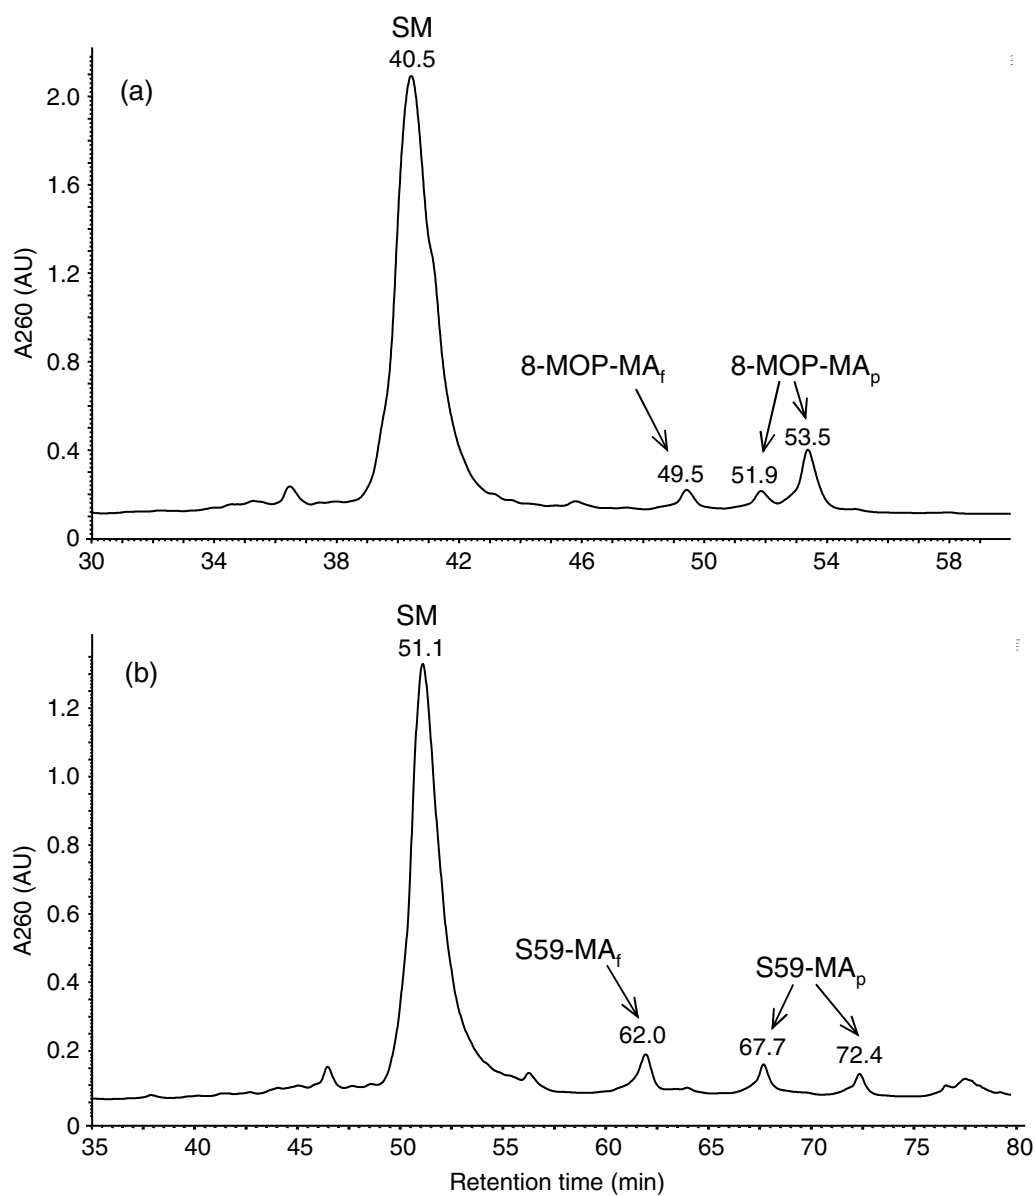

**Figure S1.** The HPLC traces for the isolation of oligodeoxynucleotides containing 8-MOP-MAs (a) and S59-MAs (b) from the photoreversal reaction mixture. Peaks indicated by arrows correspond to different types of MAs.

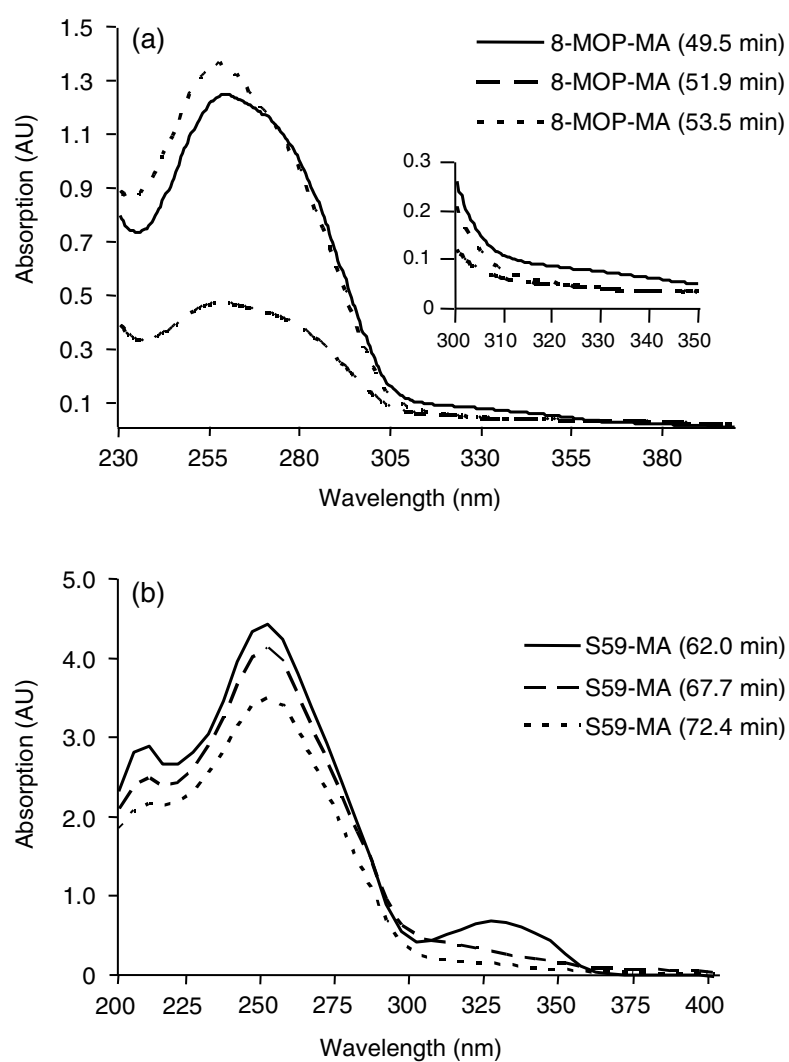

**Figure S2.** UV absorption spectra of the three 8-MOP-MA-containing ODNs (a) and three S59-MA-containing ODNs (b) fractions.

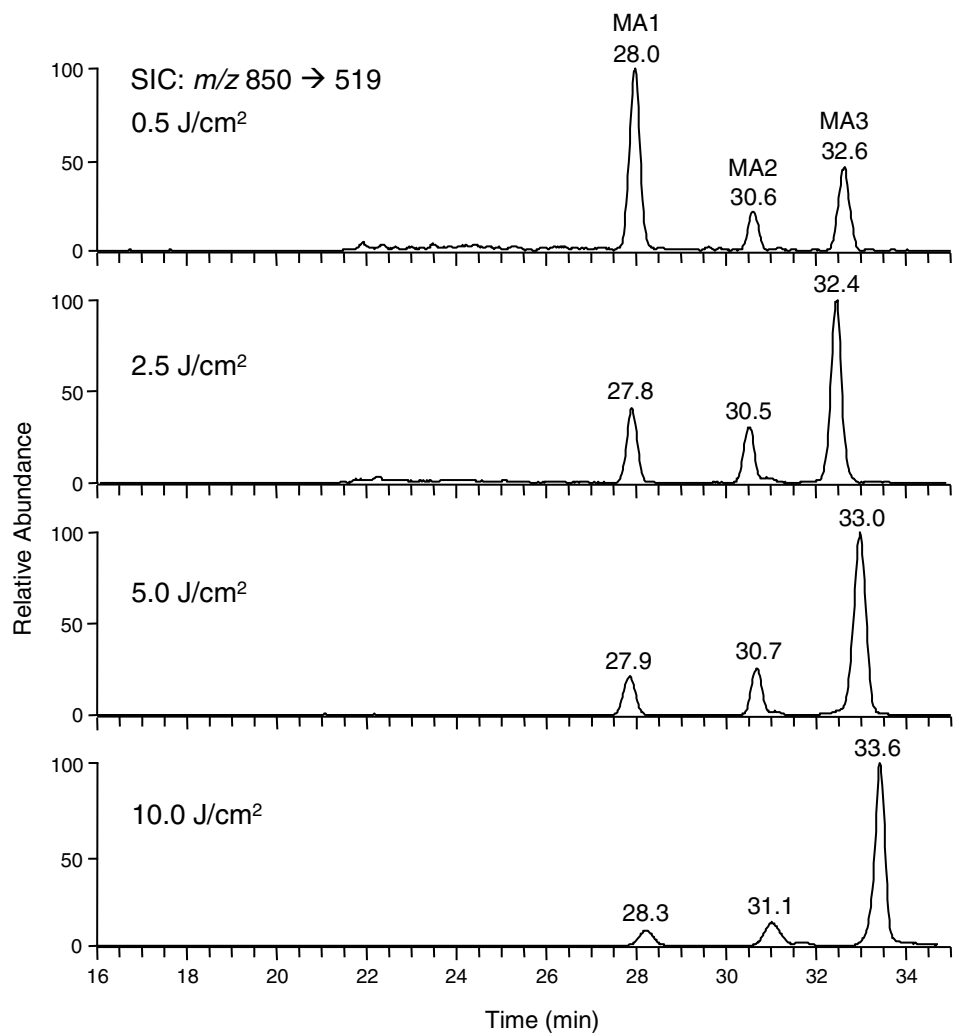

**Figure S3.** Selected-ion chromatograms (SICs) for 8-MOP-MA-containing dinucleotide in the digestion mixture of DNA isolated from 8-MOP-treated cells.

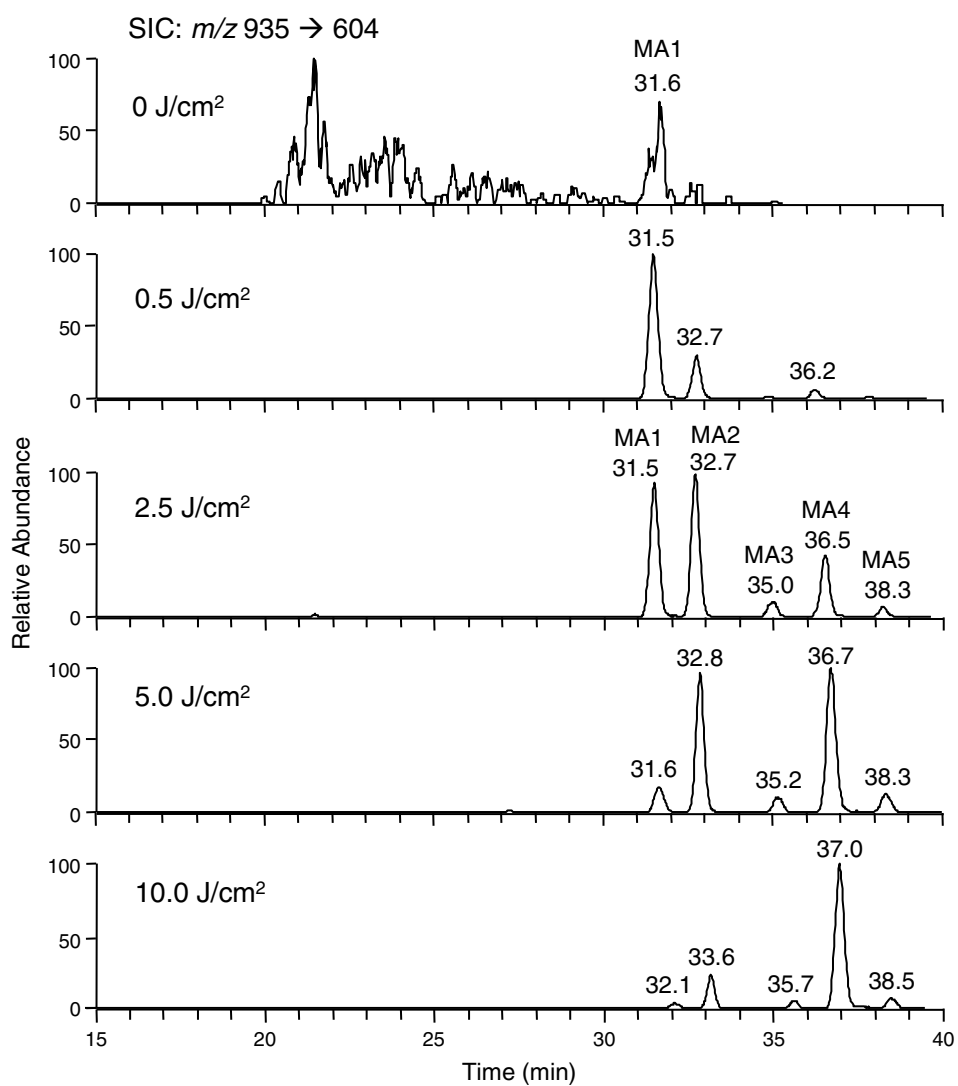

**Figure S4.** Selected-ion chromatograms (SICs) for S59-MA-containing dinucleotide in the digestion mixtures of DNA isolated from S59-treated cells.

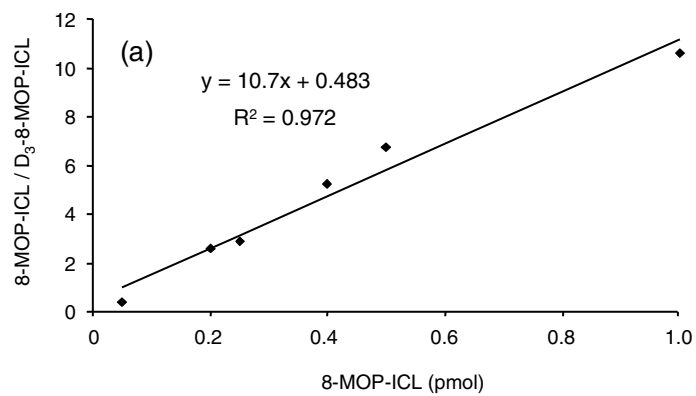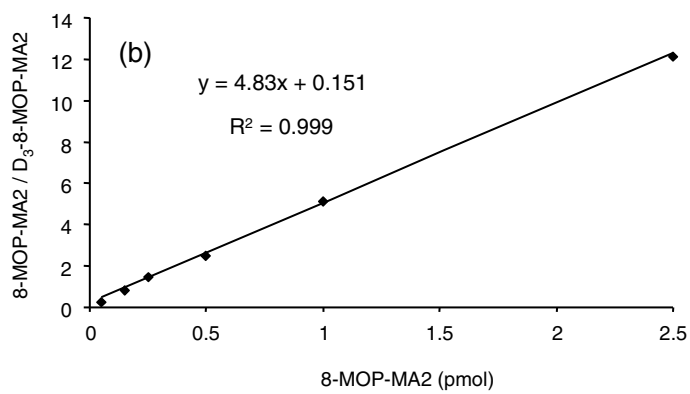

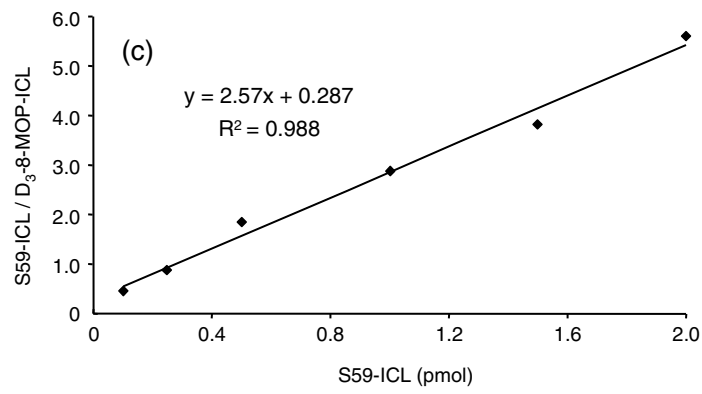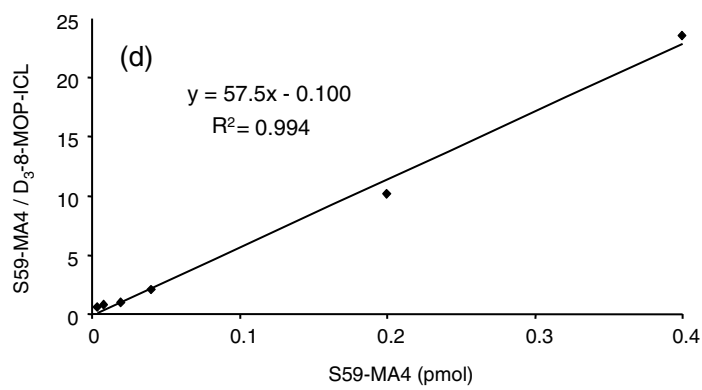

**Figure S5.** Calibration curves for the quantifications of 8-MOP-ICL (a), 8-MOP-MA2 (b), S59-ICL (c), S59-MA4 (d).

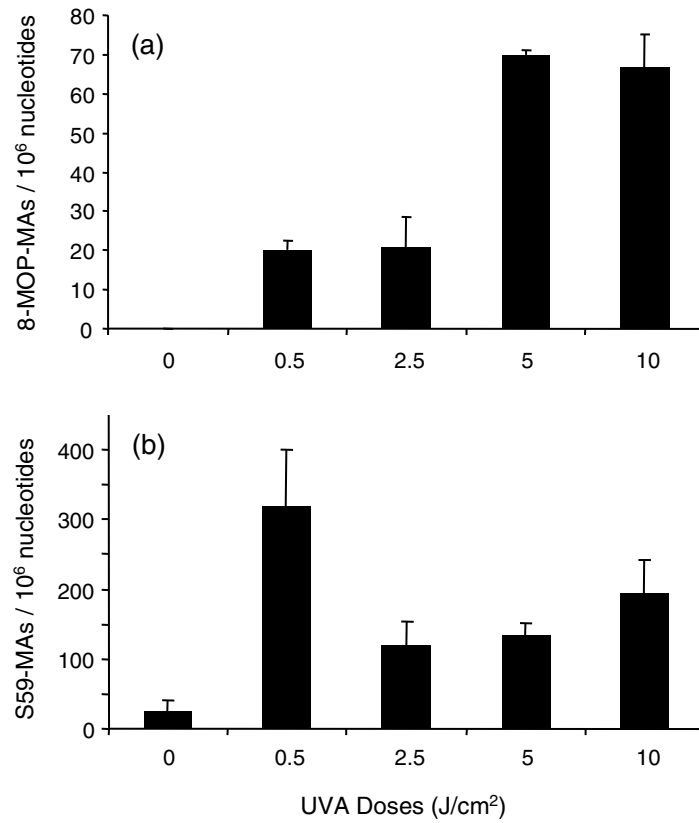

**Figure S6.** The dose-dependent formation of total 8-MOP-MAs (a) and S59-MAs (b) in WM-266-4 cells. The data represent the means and standard deviations of the results from three independent cell culture and drug treatments.
